# Supplementary material for: Considerations on the Identity and Diversity of Organisms Affiliated with Sphingobacterium multivorum—Proposal for a New Species, Sphingobacterium paramultivorum
Source: MDPI journal article supplement (doi:10.3390/microorganisms9102057), 2021-09-29
Supplement: s1 [file s1]

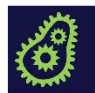

Article

# Considerations on the Identity and Diversity of Organisms Affiliated with *Sphingobacterium multivorum*—Proposal for a New Species, *Sphingobacterium paramultivorum*

Yanfang Wang <sup>1,\*</sup>, Jolanda K. Brons <sup>1</sup> and Jan Dirk van Elsas <sup>1,\*</sup>

<sup>1</sup> Cluster of Microbial Ecology, Groningen Institute for Evolutionary Life Sciences, University of Groningen, Groningen, the Netherlands; j.k.brons@rug.nl (J.K.B)

\*Correspondence: wang-yanfang@qq.com (Y.W); j.d.van.elsas@rug.nl (J.D.vE)

## Supplementary Material

### 16S sequence diversity from cloning of strain w15:

*How different are the sequences within 40 cloning sequences of w15?*

The principle a difference is included or not is based on:

1. Is the difference due to the B8F primer? If yes, then exclude, if no, then we further look at the differences (see Figure S1). The “A” difference was excluded due to the “M” in primer B8F.

**Query range 1: 1 to 60**

|             |    |                                                              |    |
|-------------|----|--------------------------------------------------------------|----|
| Query       | 8  | AGAGTTTGATCCTGGCTCAGGATGAACGCTAGCGGCAGGCCTAATACATGCAAGTCGGAC | 67 |
| Query_60058 | 1  | .....                                                        | 60 |
| Query_60064 | 1  | .....A.....                                                  | 60 |
| Query_60052 | 1  | .....                                                        | 60 |
| Query_60055 | 1  | .....A.....                                                  | 60 |
| Query_60061 | 1  | .....A.....                                                  | 60 |
| Query_60059 | 1  | .....A.....                                                  | 60 |
| Query_60056 | 1  | .....A.....                                                  | 60 |
| Query_60054 | 1  | ..T.....A.....                                               | 60 |
| Query_60053 | 1  | .....A.....                                                  | 60 |
| Query_60063 | 1  | .....                                                        | 60 |
| Query_60060 | 1  | .....A.....A..                                               | 60 |
| Query_60057 | 1  | .....                                                        | 60 |
| Query_60066 | 1  | .....A.....M.....                                            | 60 |
| Query_60062 | 1  | .....A.....                                                  | 60 |
| Query_60065 | 10 | .....                                                        | 60 |

Figure S1 Difference could be due to B8F primer (AGAGTTTGATC**M**TGGCTCAG)

2. Is the difference random, or a clear frequency can be found? Random differences could be the results of PCR error or sequencing error, so random differences as shown in Figure. S2 were excluded for sorting 16s sequence for w15.

**Query range 2: 61 to 120**

|             |    |                                                              |     |
|-------------|----|--------------------------------------------------------------|-----|
| Query       | 68 | GGGATCCGTCGG-AGAGCTTGCTCGAAGACGGTGAGA-GTGGCGCACGGGTGCGTAACGC | 125 |
| Query_60087 | 1  | .....-.....-.....                                            | 58  |
| Query_60077 | 1  | .....-.....-.....                                            | 58  |
| Query_60081 | 1  | .....-.....-.....                                            | 58  |
| Query_60079 | 1  | .....-.....TR.....                                           | 58  |
| Query_60078 | 1  | .....-.....C.....                                            | 58  |
| Query_60088 | 1  | ...K.....A.R.....                                            | 58  |
| Query_60070 | 1  | .....-.....-.....                                            | 58  |
| Query_60083 | 1  | .....-.....-.....                                            | 58  |
| Query_60084 | 1  | ...K.....R.K.....S.....                                      | 58  |
| Query_60082 | 1  | .....-.....T.....KW.....                                     | 58  |
| Query_60058 | 61 | .....-.....-.....                                            | 118 |
| Query_60064 | 61 | .....-.....-.....                                            | 118 |
| Query_60052 | 61 | .....-.....-.....                                            | 118 |
| Query_60055 | 61 | .....-.....-.....                                            | 118 |
| Query_60061 | 61 | .....-.....G.....                                            | 118 |
| Query_60059 | 61 | .....-.....-.....                                            | 118 |

Figure S2 Random differences

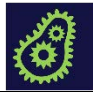

Only differences with a clear ratio/ frequency were included for analysis. See the differences in red rectangle of Figure S3.

[Download](#) ▾

Query range 4: 181 to 246

|             |     |                                                              |     |
|-------------|-----|--------------------------------------------------------------|-----|
| Query       | 186 | CATATCTGACCGGCATCGGTTGCATATTAAATATTTATAGGATAGACATGGGCTCGCGTG | 245 |
| Query_60087 | 119 | .....                                                        | 178 |
| Query_60077 | 119 | T.....                                                       | 178 |
| Query_60081 | 119 | .....                                                        | 178 |
| Query_60079 | 119 | .....                                                        | 178 |
| Query_60078 | 119 | .....                                                        | 178 |
| Query_60088 | 119 | .....                                                        | 178 |
| Query_60070 | 119 | T.....                                                       | 178 |
| Query_60083 | 119 | ...C.....                                                    | 178 |
| Query_60084 | 119 | T.....                                                       | 178 |
| Query_60082 | 119 | .....                                                        | 178 |
| Query_60058 | 179 | .....                                                        | 238 |
| Query_60064 | 179 | .....                                                        | 238 |
| Query_60052 | 179 | T.....                                                       | 238 |
| Query_60055 | 179 | Y.....                                                       | 238 |
| Query_60061 | 179 | .....                                                        | 238 |
| Query_60059 | 179 | T.....                                                       | 238 |
| Query_60056 | 179 | T.....                                                       | 238 |
| Query_60054 | 179 | .....                                                        | 238 |
| Query_60053 | 179 | T.....                                                       | 238 |
| Query_60063 | 179 | .....A.C.....                                                | 238 |
| Query_60060 | 179 | T.....                                                       | 238 |
| Query_60057 | 179 | .....A.C.....                                                | 238 |
| Query_60066 | 179 | .....                                                        | 238 |
| Query_60062 | 179 | .....                                                        | 238 |
| Query_60065 | 179 | T.....G.....A.C.....                                         | 238 |

Figure S3 Differences with a clear ratio/ frequency

# Sequences used for detection of 16S rRNA types - and their ratio - in transcriptomic level

Raw 150 bp paired reads from Illumina sequencing (LGC, GmbH, Germany) were first cleaned using fastp software (0.21.0, Chen et al. 2018). Reads with any Ns and reads length shorter than 25bp were removed. Then SortMeRna (version 4.2.0) (Kopylova et al. 2012) was used to sort out all rRNA reads, which were further used as the pool to fish out target sequences (Table S1).

Table S1 Sequences used as probes for 16S rRNA ratio of w15

| Type    | 186 | 207-209 | 463-465--474-476 | Gene sequences                | Reverse complementary         |
|---------|-----|---------|------------------|-------------------------------|-------------------------------|
| C_GA    | C   | G-A     |                  | CATATCTGACCGGC<br>ATCGGTTGGAT | ATCCAACCGATGCC<br>GGTCAGATATG |
| T_GA    | T   | G-A     |                  | TATATCTGACCGGC<br>ATCGGTTGGAT | ATCCAACCGATGCC<br>GGTCAGATATA |
| T_AC    | T   | A-C     |                  | TATATCTGACCGGC<br>ATCGGTTAGCT | AGCTAACCGATGCC<br>GGTCAGATATA |
| AAA_TTT |     |         | AAA-TTT          | AAATACGTGTATTT                | AAATACACGTATTT                |
| TTC_GGG |     |         | TTC-GGG          | TTCTACGTGTAGGG                | CCCTACACGTAGAA                |

# Analysis of taxonomic placement using alternative markers

Table S2 Similarity of 9 strains to w15 of 5 protein genes (amino acid)

| Gene                                   | rplC  | groL  | ftsA  | dnaE   | gyrB   |
|----------------------------------------|-------|-------|-------|--------|--------|
| (bp)                                   | (206) | (546) | (459) | (1473) | (653)  |
| BIGb0170                               | 100   | 100   | 100   | 100    | 100    |
| FDAARGOS 1141                          | 99.51 | 98.90 | 99.78 | 99.32  | 99.23  |
| NCTC 11343 <sup>T</sup>                | 100   | 98.90 | 100   | 98.74* | 98.74* |
| NCTC 11034                             | 100   | 98.90 | 100   | 99.12  | 98.93  |
| FDAARGOS 1142                          | 99.51 | 98.90 | 100   | 99.32  | 99.23  |
| S.siyangensePDNC006                    | 99.51 | 98.90 | 100   | 99.19  | 99.23  |
| S.siyangense SY1 <sup>T</sup>          | 99.51 | 98.90 | 100   | 99.39  | 99.23  |
| S.sp G1-14                             | 99.51 | 98.90 | 100   | 99.39  | 99.23  |
| S.spiritivorum NCTC 11386 <sup>T</sup> | 94.66 | 94.24 | 80.65 | 83.12  | 88.79  |

\*: dnaE and gyrB genes of NCTC 11343<sup>T</sup> when translated into amino acid, multiple \* were found in the sequences, thus the DSM 11691<sup>T</sup> was used for phylogenetic analysis of marker genes.

## Reference

Chen, S.; Zhou, Y.; Chen, Y.; Gu, J. fastp: an ultra-fast all-in-one FASTQ preprocessor, *Bioinformatics* **2018**, *34* (17) 1: i884–i890. doi:10.1093/bioinformatics/bty560

Kopylova, E.; Noe, L.; Touzet, H. "SortMeRNA: Fast and accurate filtering of ribosomal RNAs in metatranscriptomic data", *Bioinformatics* **2012**. doi:10.1093/bioinformatics/bts611.
